# Supplementary material
Source: JCI journal article supplement (doi:10.1172/jci202639)
Supplement: sd1 [file 1]

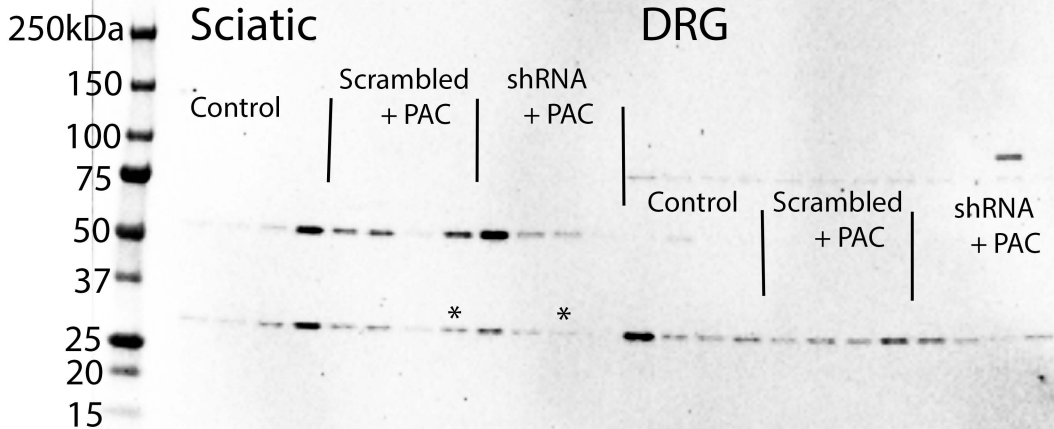

Figure 2D Inset from A1354 gel 1  
PNPase, Atlas Antibodies HPA 001625  
Rabbit polyclonal at 1:1000 32kDa

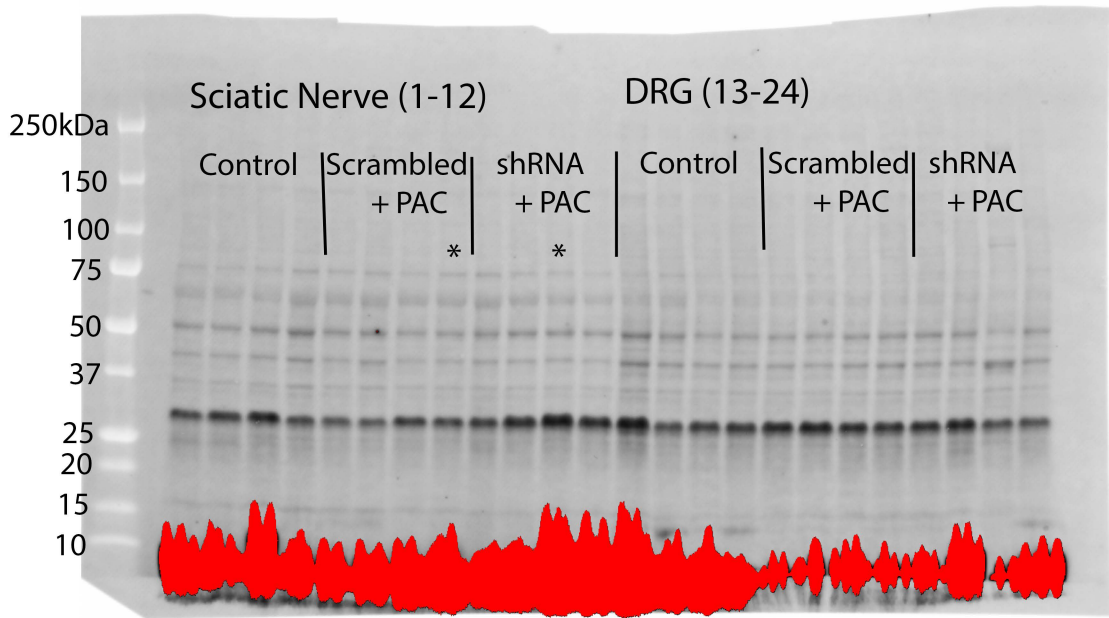

Figure 2D inset  
A1354 gel 1 stain free blot

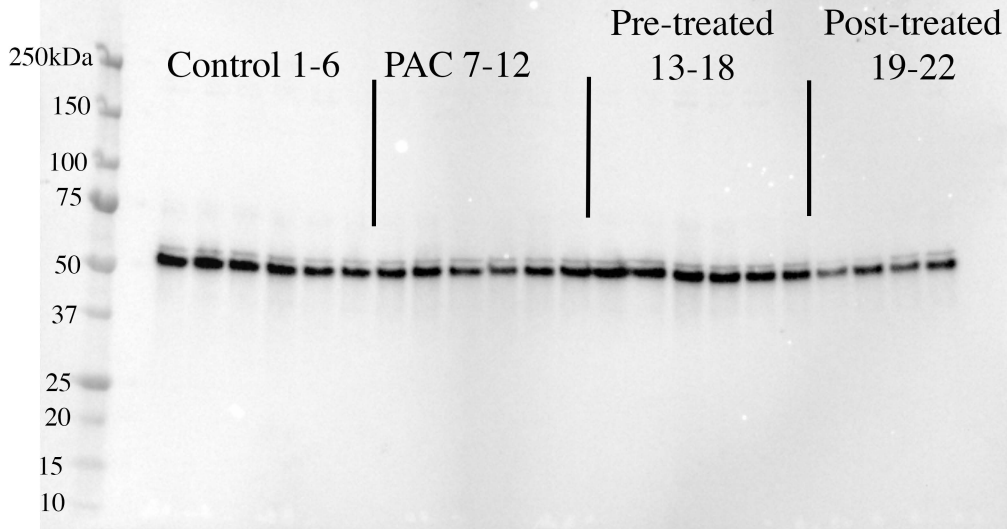

Figure 5E: A1316 gel 3 GAP43 (50kDa) in sciatic nerve  
Millipore Chemicon AB5220 Rabbit polyclonal at 1:5000

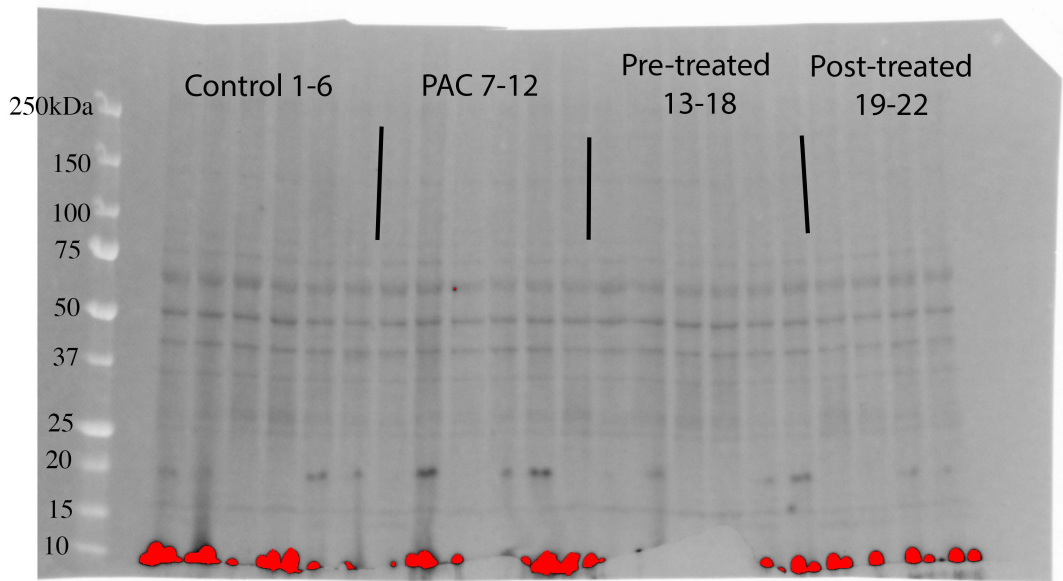

Figure 5E: A1316 stain free blot for GAP43

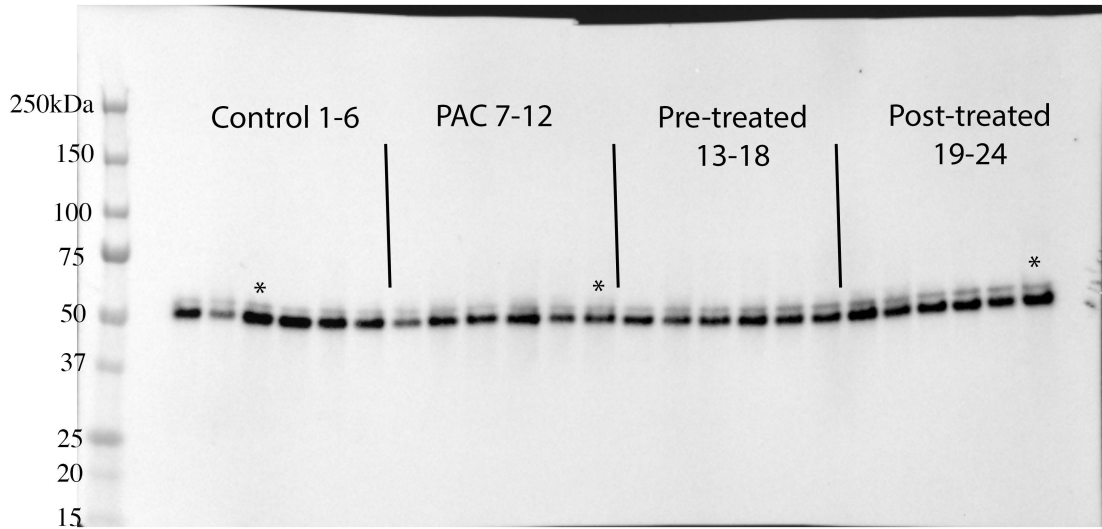

Figure 5E: A1319 gel 1 GAP43 (50kDa) in sciatic nerve  
Millipore Chemicon AB5220 Rabbit polyclonal at 1:5000

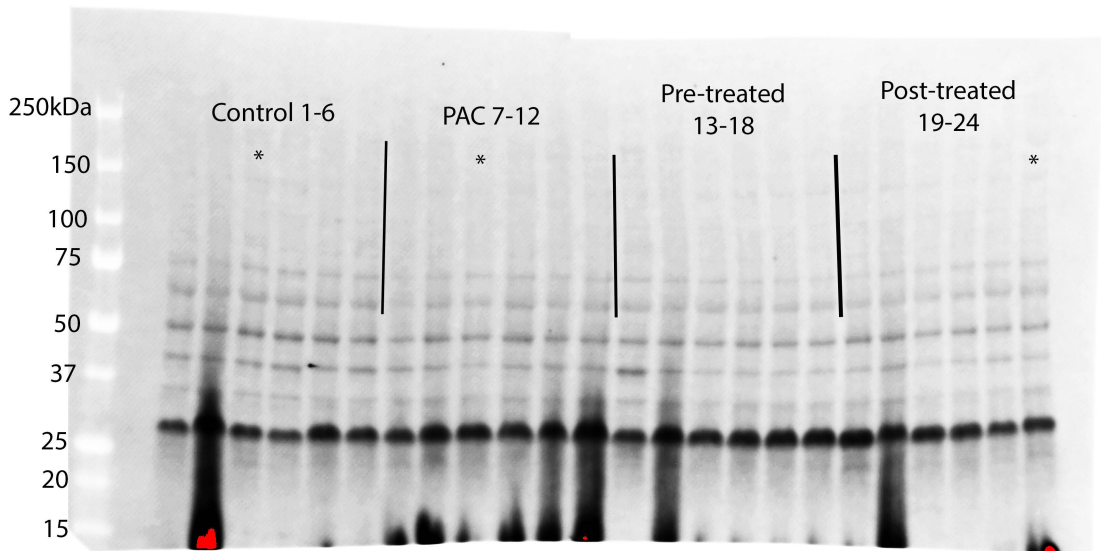

Figure 5E: A1319 stain free blot for GAP43

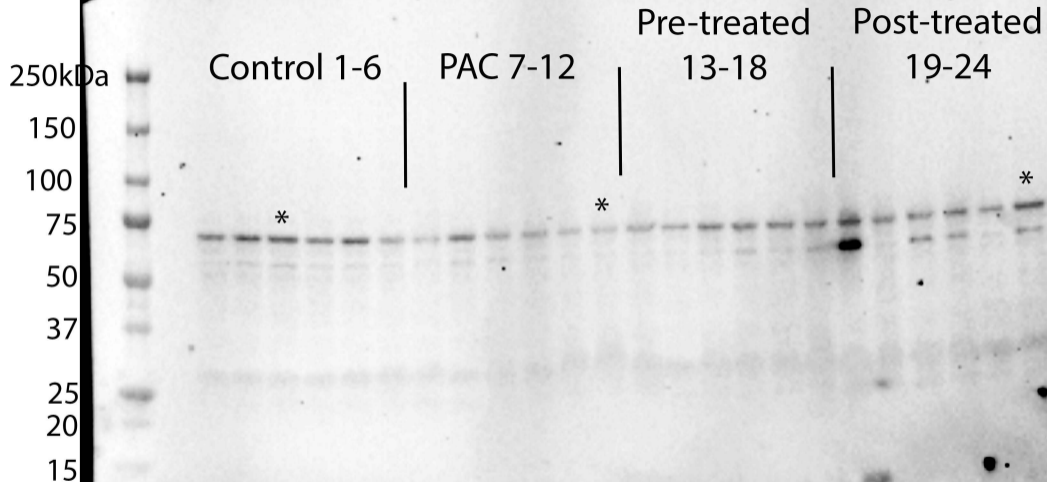

Figure 6A: A1311 gel 3 MST3b (59kDa) in sciatic nerve .  
Cell Signaling 4062S Rabbit polyclonal 1:1000

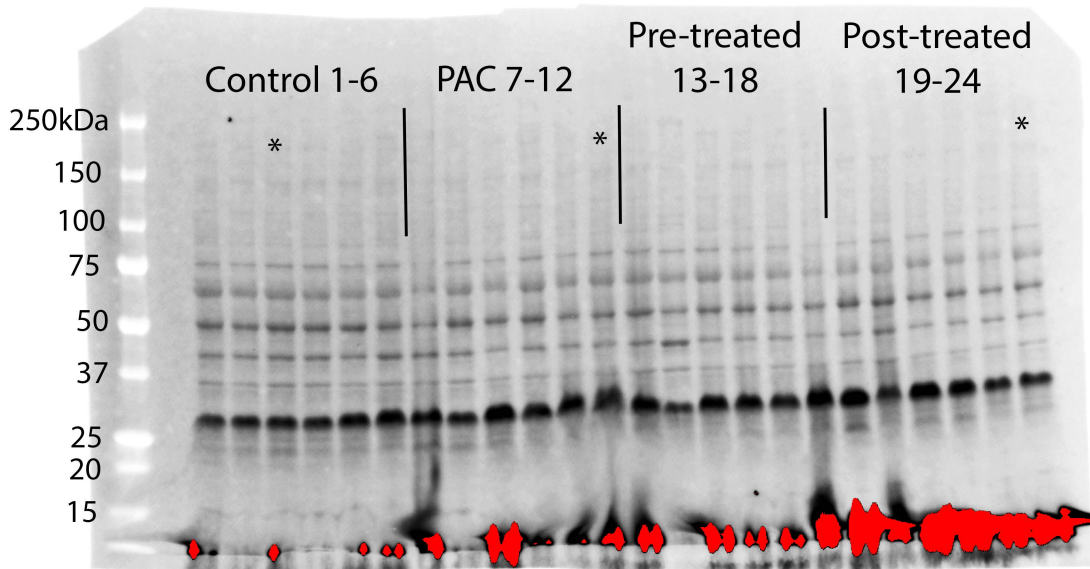

Figure 6A: A1311 gel 3 stain free blot for MST3b

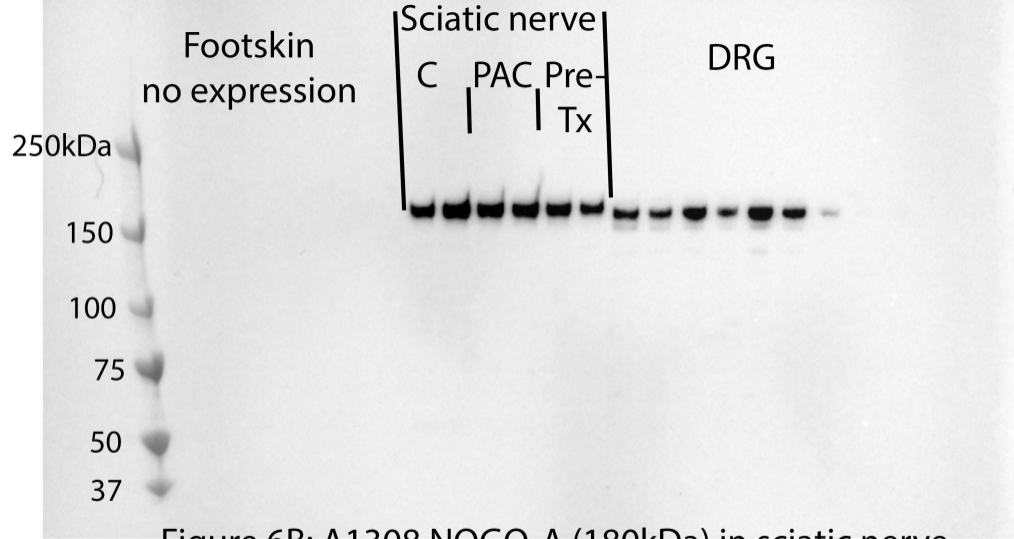

Figure 6B: A1308 NOGO-A (180kDa) in sciatic nerve  
Cell Signaling 13401 Rabbit polyclonal at 1:2000

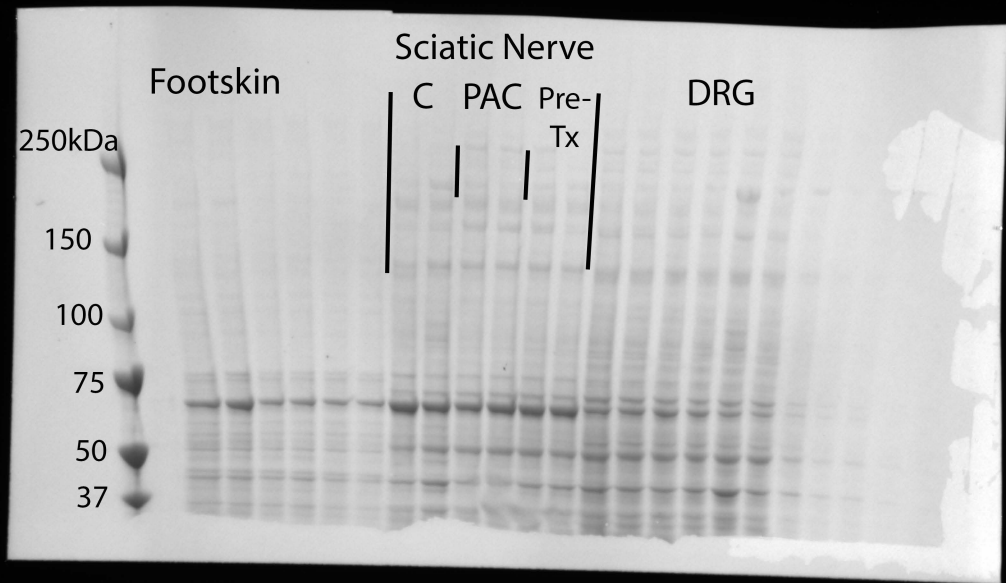

Figure 6B: A1308 protein stain for NOGO-A

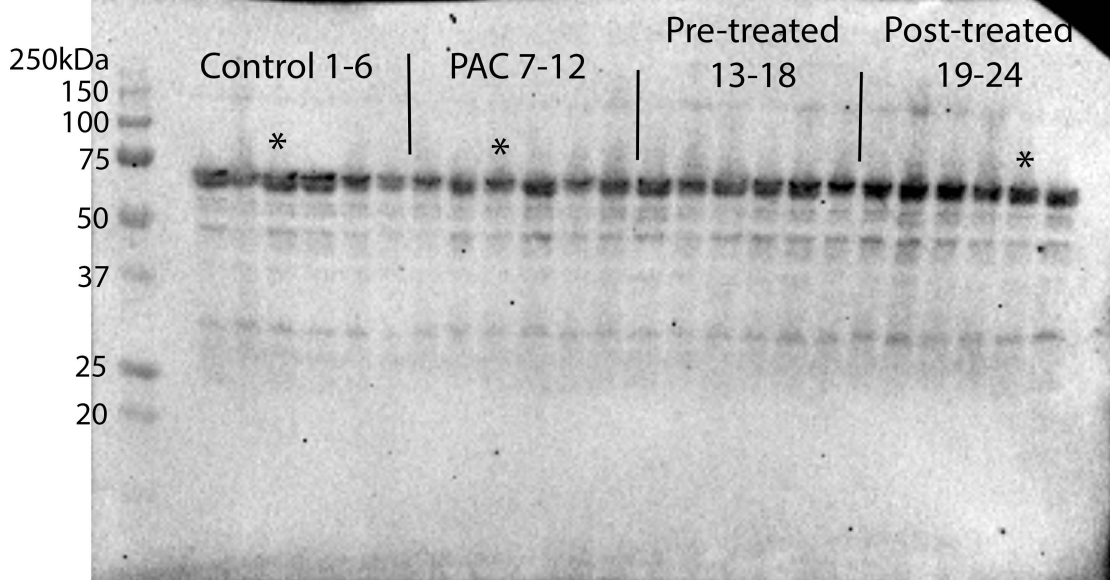

Figure 6C: A1321 gel 3 NMNAT2 (34kDa, 68kDa dimer) in sciatic nerve  
Santa Cruz SC-515206 Mouse monoclonal at 1:500

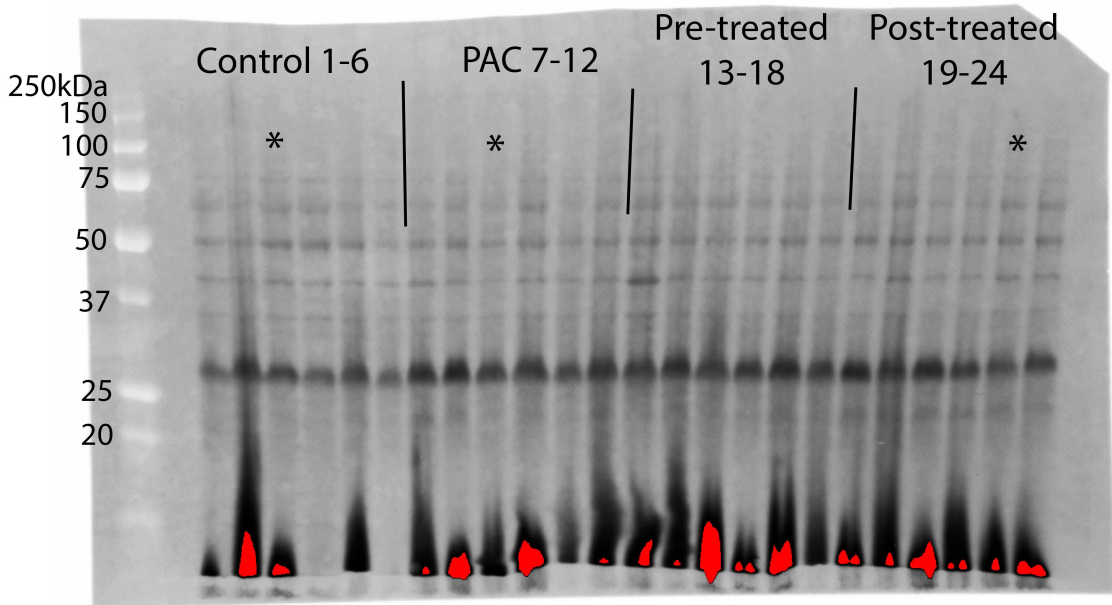

Figure 6C: A1321 gel 3 stain free blot for NMNAT2
